# Supplementary material
Source: PubMed Central journal article supplement (PMC6511514)
Supplement: NIHMS979614-supplement-Sup_Tables_1-4.pdf [file NIHMS979614-supplement-Sup_Tables_1-4.pdf]

**Supplementary Table 1. CRISPR/Cas9 killing and mutation frequencies, using ABD2003 with strain RN1**

| Sample | TU*/cell (x) | Expected survival ( $S_e=e^{-x}$ ) | Observed survival ( $S_o$ ) | IP/cell(y) $y=\ln(1/S_o)$ | IP/TU (y/x) | CRISPR-resistant mutants |     |                      |
|--------|--------------|------------------------------------|-----------------------------|---------------------------|-------------|--------------------------|-----|----------------------|
|        |              |                                    |                             |                           |             | %infected                | No. | Freq.                |
| 1      |              |                                    |                             |                           |             |                          |     |                      |
| 1      | .4           | 0.67                               | .031±.003                   | 3.5±.17                   | 8.8±.43     | 97                       | 101 | 1.0x10 <sup>-4</sup> |
| 2      | .2           | 0.82                               | .16±.05                     | 1.9±.40                   | 11±2.1      | 84                       | 72  | 8.4x10 <sup>-5</sup> |
| 3      | .1           | 0.90                               | .33±.11                     | 1.25±.43                  | 13±4.3      | 67                       | 50  | 7.9x10 <sup>-5</sup> |
| 4      | .05          | 0.95                               | .60±.01                     | .52±.006                  | 10.3±.33    | 40                       | 22  | 6.9x10 <sup>-5</sup> |
| 5      | .025         | 0.98                               | .77±.07                     | .28±.087                  | 11±3.4      | 23                       | 19  | 8.6x10 <sup>-5</sup> |
| 6      | 0            | 100                                |                             |                           | 10.8±.67    |                          |     |                      |

\*TU=transduction units; x=TU/cell;  $S_e$ =expected survival;  $S_o$ = observed survival; IP=infective particles; y=IP/cell

**Supplementary Table 2. Bacterial strains**

| <b>Strains</b>                 | <b>Description</b>                          | <b>Reference</b> |
|--------------------------------|---------------------------------------------|------------------|
| <b><i>E. coli</i></b>          |                                             |                  |
| Top10                          | <i>E. coli</i> cloning strain               | Invitrogen       |
| <b><i>L. monocytogenes</i></b> |                                             |                  |
| SK1442                         | Serotype 3B                                 | 1                |
| <b><i>S. aureus</i></b>        |                                             |                  |
| USA300 LAC                     | CA-MRSA                                     | 2                |
| Newman                         |                                             | 3                |
| Newman 7B4                     | (phage-cured)                               | 4                |
| N315                           | MRSA                                        | 5                |
| RN8703                         | RN4282 (SaPI1 <i>tst::tetM</i> )            | 6                |
| RN8465                         | (agr group III)                             | 7                |
| RN4850                         | (agr group IV)                              | 8                |
| RN9130                         | 502 $\Delta$ TcR plasmid (agr group II)     | 7                |
| 17855                          | Penicillin resistant clinical isolate       | 9                |
| RN1                            | NCTC8325                                    | 10               |
| RN25                           | NCTC8325 (cured of phages 11 and 12)        | 11               |
| RN450                          | NCTC8325 (cured of phages 11, 12 and 13)    | 11               |
| RN4220                         | Restriction-defective derivative of RN450   | 12               |
| RN10616                        | RN4220(80 $\alpha$ )                        | 13               |
| RN10359                        | RN450(80 $\alpha$ )                         | 14               |
| JCSA777                        | RN10359- $\Delta$ <i>agr::cadCA</i>         | 15               |
| JCSA778                        | JCSA777 (80 $\alpha$ $\Delta$ <i>terS</i> ) | 15               |
| RN408                          | 8331 (PS29)                                 |                  |
| RN5006                         | <i>S. aureus</i> clinical isolate           |                  |
| RN5007                         | <i>S. aureus</i> clinical isolate           |                  |
| GRSA828                        | RN10616- $\Delta$ <i>agr::cadCA</i>         | (This work)      |
| GRSA830                        | GRSA828 (ABD2001)                           | (This work)      |
| RN12134                        | RN1- $\Delta$ <i>agr::cadCA</i>             | (This work)      |
| GRSA845                        | GRSA828 (ABD2003)                           | (This work)      |
| GRSA891                        | GRSA828 (ABD2002)                           | (This work)      |
| GRSA891                        | GRSA828 (ABD2004)                           | (This work)      |
| GRSA906                        | GRSA828 (ABD2005)                           | (This work)      |
| GRSA908                        | GRSA828 (ABD2006)                           | (This work)      |
| RN12154                        | JCSA778 (ABD2001)                           | (This work)      |
| RN12065                        | JCSA778 (ABD2002)                           | (This work)      |
| RN12066                        | JCSA778 (ABD2003)                           | (This work)      |
| RN12153                        | JCSA778 (ABD2004)                           | (This work)      |
| RN12143                        | JCSA778 (ABD2005)                           | (This work)      |
| RN12148                        | GRSA778 (ABD2006)                           | (This work)      |
| RN12133                        | RN25 (80 $\alpha$ , pRN7141)                | (This work)      |
| GRSA1005                       | RN12133 (ABD2001)                           | (This work)      |
| GRSA1008                       | RN12133 (ABD2005)                           | (This work)      |
| GRSA1011                       | RN12133 (ABD2006)                           | (This work)      |

**Supplementary Table 3. Plasmids**

| Plasmid                                     | Description                                                                      | Reference        |
|---------------------------------------------|----------------------------------------------------------------------------------|------------------|
| pUC18                                       | <i>E. coli</i> vector                                                            | 16               |
| pDB114                                      | Plasmid carrying CRISPR/ <i>cas9</i>                                             | 17               |
| Pdcas9                                      | Plasmid carrying CRISPR/ <i>dcas9</i>                                            | 18               |
| pMAD                                        | Vector for allelic replacement                                                   | 19               |
| pET28b                                      | <i>E. coli</i> vector                                                            | Novagen #69865-3 |
| pET28b-S2Up:CRISPR/ <i>cas9</i> :S2Dn*      | pET28b with flanked CRISPR/ <i>cas9</i> module – used for spacer insertion       | This work        |
| pMAD-S2Up:CRISPR/ <i>cas9</i> /spacer:S2Dn  | pMAD with flanked CRISPR/ <i>cas9</i> module + spacer, used for allelic exchange | This work        |
| pACYC184                                    | <i>E. coli</i> vector                                                            | 20               |
| pACYC184-S2Up:CRISPR/ <i>dcas9</i> :S2Dn    | pACYC184 with flanked CRISPR/ <i>dcas9</i> module- used for spacer insertion     | This work        |
| pMAD-S2Up:CRISPR/ <i>dcas9</i> /spacer:S2Dn | pMAD with flanked CRISPR/ <i>dcas9</i> module + spacer used for allelic exchange | This work        |
| pRN7141                                     | pMK4:: <i>agrP<sub>3</sub>-lux</i>                                               | 21               |

\*S2Up and S2Dn are the SaPI2 flanking sequences up and downstream of the projected insertion site, which participate in allelic exchange with ABD2001.

**Supplementary Table 4. Primer and spacer oligonucleotides**

|                                                |
|------------------------------------------------|
| 5'- AATT CTGAG TACAAATAGTGAAGTTTTAGATAATTCC-3' |
| 5'- AATT CCCGGG CAAGGATTATATGGTTGGAATG-3'      |
| 5'-AATT CTGCAG TTACGAAATCATCCTGTGGAGC-3'       |
| 5-AATT CTGAG GAACTCAACAAGTCTCAGTGTGCTG-3'      |
| 5'-AAACATTTAACATTTGTCTACAAAGTTGCAGCGAG-3'      |
| 5'-AAAACCTGCTGCAACTTTGTAGACAAATGTTAAAT-3'      |
| 5'-AAACAAGATTGTAATAAATCGTATAATGACAGTGG-3'      |
| 5'-AAAACCACTGTCATTATACGATTTAGTACAATCTT-3'      |
| 5'-AAACGTCCTAAGACGCCAATCGAAAAGAAACACGG-3'      |
| 5'-AAAACCGTGTTCCTTTTCGATTGGCGTCTTAGGAC-3'      |
| 5'-AATT CTGCAG CTGTTTCCTTTTCTTTATGATAGTTTAC-3' |
| 5-AATT CTGAG CCTTTTTTAAAAGTCAATATACTGTAAC-3'   |
| 5'-AATT AGATCT ATTATCGATAATTAATCCGAACATATC-3'  |
| 5'-AATT CTGCAG ATAAGCATTATATTGCAATGAAAAAG-3'   |
| 5'-AATT CTGCAG CTGTTTCCTTTTCTTTATGATAGTTTAC-3' |

Shading represents the actual spacer sequence

## References

- 1 Chen, J. & Novick, R. P. Phage-mediated intergeneric transfer of toxin genes. *Science* **323**, 139-141 (2009).
- 2 Boyle-Vavra, S. & Daum, R. S. Community-acquired methicillin-resistant *Staphylococcus aureus*: the role of Panton-Valentine leukocidin. *Lab Invest* **87**, 3-9, doi:10.1038/labinvest.3700501 (2007).
- 3 Baba, T., Bae, T., Schneewind, O., Takeuchi, F. & Hiramatsu, K. Genome sequence of *Staphylococcus aureus* strain Newman and comparative analysis of staphylococcal genomes: polymorphism and evolution of two major pathogenicity islands. *J Bacteriol* **190**, 300-310, doi:10.1128/JB.01000-07 (2008).
- 4 Bae, T. & Schneewind, O. Allelic replacement in *Staphylococcus aureus* with inducible counter-selection. *Plasmid* **55**, 58-63 (2006).
- 5 Kuroda, M. *et al.* Whole genome sequencing of methicillin-resistant *Staphylococcus aureus*. *Lancet* **357**, 1225-1240 (2001).
- 6 Lindsay, J. A., Ruzin, A., Ross, H. F., Kurepina, N. & Novick, R. P. The gene for toxic shock toxin is carried by a family of mobile pathogenicity islands in *Staphylococcus aureus*. *Mol. Microbiol.* **29**, 527-543 (1998).
- 7 Ji, G., Beavis, R. C. & Novick, R. P. Cell density control of staphylococcal virulence mediated by an octapeptide pheromone. *Proc. Natl. Acad. Sci. USA* **92**, 12055-12059 (1995).
- 8 Jarraud, S. *et al.* Exfoliatin-Producing Strains Define a Fourth agr Specificity Group in *Staphylococcus aureus*. *J. Bacteriol.* **182**, 6517-1437 (2000).
- 9 Dyke, K. G. H., Parker, M. T. & Richmond, M. H. Penicillinase production and metal-ion resistance in *S. aureus* cultures isolated from hospital patients. *J. Med. Microbiol.* **3**, 125-136 (1970).
- 10 Novick, R. P., R.P. & Richmond, M. H. Nature and interactions of the genetic elements governing penicillinase synthesis in *Staphylococcus aureus* *J. Bacteriol.* **90**, 467-480 (1965).
- 11 Novick, R. P. Properties of a cryptic high-frequency transducing phage in *Staphylococcus aureus*. *Virology* **33**, 155-166 (1967).
- 12 de Azavedo, J. C. *et al.* Expression of the cloned toxic shock syndrome toxin 1 gene (tst) in vivo with a rabbit uterine model. *Infect. Immun.* **50**, 304-309 (1985).
- 13 Ubeda, C. *et al.* Specificity of staphylococcal phage and SaPI DNA packaging as revealed by integrase and terminase mutations. *Mol Microbiol* **72**, 98-108 (2009).
- 14 Ubeda, C., Penades, J. R. & Novick, R. P. A pathogenicity island replicon in *Staphylococcus aureus* replicates as an unstable plasmid. *Proc Nat Acad Sci, USA* **104**, 14182-14188 (2007).
- 15 Chen, J., Ram, G., Penadés, J.R., Brown, S., Novick, R.P. Pathogenicity Island-Directed Transfer of Unlinked Chromosomal Virulence Genes. *Mol Cell.* 2015 Jan 8;57(1):138-49.
- 16 Norrander, J., Kempe, T. & Messing, J. Construction of improved M13 vectors using oligodeoxynucleotide-directed mutagenesis. *Gene* **26**, 101-106 (1983).
- 17 Bikard, D. *et al.* Exploiting CRISPR-Cas nucleases to produce sequence-specific antimicrobials. *Nat Biotechnol* **32**, 1146-1150, doi:10.1038/nbt.3043 (2014).
- 18 Bikard, D. *et al.* Programmable repression and activation of bacterial gene expression using an engineered CRISPR-Cas system. *Nucleic Acids Res* **41**, 7429-7437, doi:10.1093/nar/gkt520 (2013).
- 19 Arnaud, M., Chastanet, A. & Debarbouille, M. New vector for efficient allelic replacement in naturally nontransformable, low-GC-content, gram-positive bacteria. *Appl Environ Microbiol* **70**, 6887-6891 (2004).

- 20 Schottel, J. L., Bibb, M. J. & Cohen, S. N. Cloning and expression in streptomyces lividans of antibiotic resistance genes derived from Escherichia coli. *J Bacteriol* **146**, 360-368 (1981).
- 21 Wright, J. S., 3rd, Jin, R. & Novick, R. P. Transient interference with staphylococcal quorum sensing blocks abscess formation. *Proc Natl Acad Sci U S A* **102**, 1691-1696 (2005).
